# Supplementary material
Source: PubMed Central journal article supplement (PMC8627907)

**<sup>177</sup>Lu-PSMA-617 versus Docetaxel in Chemotherapy-naïve Metastatic Castration-Resistant Prostate Cancer: A Randomized, Controlled, Phase 2 Non-inferiority Trial**

**Supplementary Material**

**Journal:** European Journal of Nuclear Medicine and Molecular Imaging

**Authors:**

Swayamjeet Satapathy<sup>1</sup>; Bhagwant Rai Mittal<sup>1</sup>; Ashwani Sood<sup>1</sup>; Chandan Krushna Das<sup>2</sup>; Ravimohan Suryanarayan Mavuduru<sup>3</sup>; Shikha Goyal<sup>4</sup>; Jaya Shukla<sup>1</sup>; Shrawan Kumar Singh<sup>3</sup>

**Author affiliations:**

<sup>1</sup>Department of Nuclear Medicine, Post Graduate Institute of Medical Education and Research, Chandigarh-160012, India

<sup>2</sup>Medical Oncology, Regional Cancer Centre, Post Graduate Institute of Medical Education and Research, Chandigarh-160012, India

<sup>3</sup>Department of Urology, Post Graduate Institute of Medical Education and Research, Chandigarh-160012, India

<sup>4</sup>Department of Radiotherapy, Post Graduate Institute of Medical Education and Research, Chandigarh-160012, India

**\*Corresponding Author**

Prof. Bhagwant Rai Mittal

Email: [brmittal@yahoo.com](mailto:brmittal@yahoo.com)

## Supplementary Table 1: Eligibility criteria for patient accrual

| Inclusion Criteria                                                                                                                                                                                                                                                                                                                                                                                                                                                                                                                                                                                                                                                                                                                                                                                                                                                                                                                                                                                                                                                                                                                                                                                                                                                                                                                                                                                                                                                                                                                                                                                                                                                                                                                                                                                                                                     |
|--------------------------------------------------------------------------------------------------------------------------------------------------------------------------------------------------------------------------------------------------------------------------------------------------------------------------------------------------------------------------------------------------------------------------------------------------------------------------------------------------------------------------------------------------------------------------------------------------------------------------------------------------------------------------------------------------------------------------------------------------------------------------------------------------------------------------------------------------------------------------------------------------------------------------------------------------------------------------------------------------------------------------------------------------------------------------------------------------------------------------------------------------------------------------------------------------------------------------------------------------------------------------------------------------------------------------------------------------------------------------------------------------------------------------------------------------------------------------------------------------------------------------------------------------------------------------------------------------------------------------------------------------------------------------------------------------------------------------------------------------------------------------------------------------------------------------------------------------------|
| <ul style="list-style-type: none"> <li>• Biopsy proven adenocarcinoma prostate</li> <li>• Castration resistant prostate cancer defined by castrate serum testosterone &lt;50 ng/dl or 1.7 nmol/l plus one of the following types of progression:               <ul style="list-style-type: none"> <li>○ Biochemical progression: Three consecutive rises in PSA one week apart, resulting in two 50% increases over the nadir, and PSA &gt;2 ng/ml.</li> <li>○ Radiologic progression: The appearance of new lesions: either two or more new bone lesions on bone scan or a soft tissue lesion using the Response Evaluation Criteria in Solid Tumours.</li> </ul> </li> <li>• Metastatic disease (as established by <sup>68</sup>Ga –PSMA-11 PET/CT)</li> <li>• Significant PSMA expression in <sup>68</sup>Ga –PSMA-11 PET/CT defined as tracer avidity of at least 80% of the lesions being significantly (≥1.5 times) greater than that of normal liver with none of the lesions having uptake less than that of liver</li> <li>• Chemotherapy naive patients; patients with prior treatment of new generation antiandrogens will however be included</li> <li>• ECOG performance 0-2</li> <li>• Adequate renal function – Technetium-99m diethylenetriaminepentaacetate GFR ≥40 mL/min</li> <li>• Stable haematological parameters:               <ul style="list-style-type: none"> <li>○ Hemoglobin ≥ 9 g/dL</li> <li>○ Neutrophils ≥ 1500/mcL</li> <li>○ Platelets ≥ 75000/mcL</li> </ul> </li> <li>• Adequate liver function:               <ul style="list-style-type: none"> <li>○ Bilirubin &lt; 1.5 x ULN (or if bilirubin is between 1.5-2x ULN, must have a normal conjugated bilirubin)</li> <li>○ Transaminases ≤ 1.5 x ULN (or ≤ 5.0 x ULN in the presence of liver metastases)</li> <li>○ Albumin ≥ 2.5 g/dL</li> </ul> </li> </ul> |
| Exclusion Criteria                                                                                                                                                                                                                                                                                                                                                                                                                                                                                                                                                                                                                                                                                                                                                                                                                                                                                                                                                                                                                                                                                                                                                                                                                                                                                                                                                                                                                                                                                                                                                                                                                                                                                                                                                                                                                                     |
| <ul style="list-style-type: none"> <li>• Prostate cancer with sarcomatous/spindle cell/small cell differentiation</li> <li>• PSMA expression in <sup>68</sup>Ga – PSMA PET/CT less than liver</li> <li>• Sjogren Syndrome</li> <li>• Prior treatment with Docetaxel/Cabazitaxel/<sup>177</sup>Lu-PSMA RLT</li> <li>• Active malignancy other than prostate cancer</li> <li>• Concurrent illness, including severe infection</li> <li>• Patients who are sexually active and not willing/able to use medically acceptable forms of barrier contraception</li> </ul>                                                                                                                                                                                                                                                                                                                                                                                                                                                                                                                                                                                                                                                                                                                                                                                                                                                                                                                                                                                                                                                                                                                                                                                                                                                                                     |
| <p>ECOG: Eastern Cooperative Oncology Group; GFR: Glomerular Filtration Rate; PSA: Prostate Specific Antigen; PSMA : Prostate Specific Membrane Antigen; RLT: Radioligand Therapy; ULN: Upper Limit of Normal</p>                                                                                                                                                                                                                                                                                                                                                                                                                                                                                                                                                                                                                                                                                                                                                                                                                                                                                                                                                                                                                                                                                                                                                                                                                                                                                                                                                                                                                                                                                                                                                                                                                                      |

**Supplementary Table 2: Subgroup analysis of efficacy end-points**

| Parameter                                                                                                                                                                                                                                  | First-line therapy in mCRPC      |                 |                     | ≥Second-line therapy in mCRPC     |                  |                     |
|--------------------------------------------------------------------------------------------------------------------------------------------------------------------------------------------------------------------------------------------|----------------------------------|-----------------|---------------------|-----------------------------------|------------------|---------------------|
|                                                                                                                                                                                                                                            | <sup>177</sup> Lu-PSMA-617 (N=6) | Docetaxel (N=8) | Difference (95% CI) | <sup>177</sup> Lu-PSMA-617 (N=14) | Docetaxel (N=12) | Difference (95% CI) |
| <b>Best PSA-RR, n/N (%)</b>                                                                                                                                                                                                                | 3/6 (50%)                        | 2/8 (25%)       | 25% (-21–61)        | 7/14 (50%)                        | 6/12 (50%)       | 0% (-34–34)         |
| <b>ORR, n/N (%)</b>                                                                                                                                                                                                                        | 3/4 (75%)                        | 3/7 (43%)       | 32% (-23–66)        | 2/9 (22%)                         | 3/12 (25%)       | 3% (-33–35)         |
| <b>MRR, n/N (%)</b>                                                                                                                                                                                                                        | 2/4 (50%)                        | 2/7 (29%)       | 21% (-28–62)        | 4/10 (40%)                        | 4/12 (33%)       | 7% (-29–41)         |
| <b>PFS rate at 6 months (%)</b>                                                                                                                                                                                                            | 33%                              | 12.5%           | 20.5% (-21–58)      | 17%                               | 25%              | 8% (-22–38)         |
| CI: Confidence Intervals; mCRPC: Metastatic Castration-Resistant Prostate Cancer; MRR: Molecular Response Rate; ORR: Objective Radiological Response Rate; PFS: Progression-free Survival; PSA-RR: prostate specific antigen-response rate |                                  |                 |                     |                                   |                  |                     |

**Supplementary Table 3: Univariate and multivariate analysis of potential prognostic factors for progression-free survival**

| Parameter                                                                                                                                       | Univariate HR (95% CI) | p value | Multivariate HR (95% CI) | p value |
|-------------------------------------------------------------------------------------------------------------------------------------------------|------------------------|---------|--------------------------|---------|
| Age                                                                                                                                             | 0.97 (0.93-1.01)       | 0.19    | --                       | --      |
| Gleason score ≥8 versus <8                                                                                                                      | 1.34 (0.64-2.79)       | 0.43    | --                       | --      |
| ECOG score                                                                                                                                      |                        | 0.82    | --                       | --      |
| ECOG 0                                                                                                                                          | 1                      |         | --                       | --      |
| ECOG 1                                                                                                                                          | 0.73 (0.28-1.90)       |         | --                       | --      |
| ECOG 2                                                                                                                                          | 0.85 (0.29-2.49)       |         | --                       | --      |
| Prior novel anti-androgens (Yes versus No)                                                                                                      | 1.03 (0.49-2.13)       | 0.94    | --                       | --      |
| Skeletal lesions ≥20 versus <20                                                                                                                 | 1.13 (0.58-2.21)       | 0.72    | --                       | --      |
| Visceral metastasis (Yes versus No)                                                                                                             | 1.50 (0.69-3.26)       | 0.30    | --                       | --      |
| Baseline ALP                                                                                                                                    | 1.002 (1.000-1.003)    | 0.05    | 1.001 (1.000-1.003)      | 0.11    |
| Baseline PSA                                                                                                                                    | 0.999 (0.998-1.001)    | 0.47    | --                       | --      |
| Treatment ( <sup>177</sup> Lu-PSMA-617 versus Docetaxel)                                                                                        | 0.90 (0.46–1.77)       | 0.77    | --                       | --      |
| PSA decline ≥50% (No versus Yes)                                                                                                                | 3.71 (1.73-7.92)       | <0.01   | 4.57 (1.74-11.95)        | <0.01   |
| ALP: Alkaline Phosphatase; CI: Confidence Intervals; ECOG: Eastern Cooperative Oncology Group; HR: Hazard Ratio; PSA: Prostate specific antigen |                        |         |                          |         |

**Supplementary Table 4: Post-study treatments in the two arms**

| <b>Post-study Treatment</b> | <b><sup>177</sup>Lu-PSMA-617 arm (No.)</b> | <b>Docetaxel arm (No.)</b> |
|-----------------------------|--------------------------------------------|----------------------------|
| Docetaxel                   | 5                                          | 0                          |
| Abiraterone                 | 1                                          | 3                          |
| Enzalutamide                | 2                                          | 9                          |
| <sup>177</sup> Lu-PSMA-617  | 0                                          | 1                          |
| <sup>225</sup> Ac-PSMA-617  | 1                                          | 0                          |

**Supplementary Table 5: Pre- and post-therapy health-related quality of life scores as measured with NCCN-FACT-FPSI-17 questionnaire**

| Scale (maximum score) | <sup>177</sup> Lu-PSMA-617 arm (n=15) |                                 |                                            | Docetaxel arm (n=20)           |                                 |                                            | p value <sup>b</sup> |
|-----------------------|---------------------------------------|---------------------------------|--------------------------------------------|--------------------------------|---------------------------------|--------------------------------------------|----------------------|
|                       | Pre-therapy score <sup>a</sup>        | Post-therapy score <sup>a</sup> | Change in score from baseline <sup>a</sup> | Pre-therapy score <sup>a</sup> | Post-therapy score <sup>a</sup> | Change in score from baseline <sup>a</sup> |                      |
| DRS-P (40)            | 24 (14 – 27)                          | 29 (17 – 33)                    | 4 (-3 – 10)                                | 27.5 (25 – 30)                 | 25 (23 – 29)                    | -2 (-5 – 0.8)                              | <b>0.023</b>         |
| DRS-E (4)             | 2 (1 – 4)                             | 3 (2 – 4)                       | 0 (0 – 2)                                  | 2 (1.25 – 3)                   | 2 (2 – 3)                       | 0 (-1 – 1)                                 | <b>0.043</b>         |
| TSE (16)              | 13 (10 – 15)                          | 13 (12 – 15)                    | 0 (0 – 1)                                  | 8 (7.25 – 9)                   | 7 (5 – 7.8)                     | -2 (-4 – 0)                                | <b>0.001</b>         |
| F/WB (8)              | 4 (2 – 7)                             | 4 (3 – 7)                       | 0 (0 – 1)                                  | 6 (3.2 – 8)                    | 4 (4 – 7)                       | -0.5 (-3 – 1)                              | 0.191                |
| Total FPSI-17 (68)    | 41 (28 – 51)                          | 49 (33 – 58)                    | 7 (-4 – 15)                                | 44 (39 – 50.5)                 | 38 (31 – 45)                    | -8 (-11 – 1)                               | <b>0.003</b>         |

<sup>a</sup>Variables expressed as median and interquartile range (1<sup>st</sup> quartile – 3<sup>rd</sup> quartile)

<sup>b</sup>Comparison of median change in scores from baseline in the two arms: p value calculated using Mann-Whitney U test

*DRS-E: Disease-related symptoms – emotional; DRS-P: Disease-related symptoms – physical; FPSI: FACT Prostate Symptom Index; F/WB: Function/well-being; TSE: Treatment side-effects*

**Supplementary Table 6: Efficacy end-points in patients with visceral metastases**

| <b>Parameter</b>                                                                                                                                         | <b><sup>177</sup>Lu-PSMA-617 arm (N=5)</b> | <b>Docetaxel arm (N=4)</b> |
|----------------------------------------------------------------------------------------------------------------------------------------------------------|--------------------------------------------|----------------------------|
| <b>Best PSA-RR, n/N (%)</b>                                                                                                                              | 1/5 (20%)                                  | 3/4 (75%)                  |
| <b>ORR, n/N (%)</b>                                                                                                                                      | 0/2 (0%)                                   | 2/4 (50%)                  |
| <b>MRR, n/N (%)</b>                                                                                                                                      | 0/2 (0%)                                   | 1/4 (25%)                  |
| <b>PFS rate at 6 months (%)</b>                                                                                                                          | 0%                                         | 25%                        |
| MRR: Molecular Response Rate; ORR: Objective Radiological Response Rate; PFS: Progression-free Survival; PSA-RR: prostate specific antigen-response rate |                                            |                            |

**Supplementary Fig.1: Waterfall plots describing the percentage changes in serum PSA values from baseline in intention-to-treat analysis. CI: confidence intervals; PSA = prostate specific antigen; PSMA = prostate specific membrane antigen**

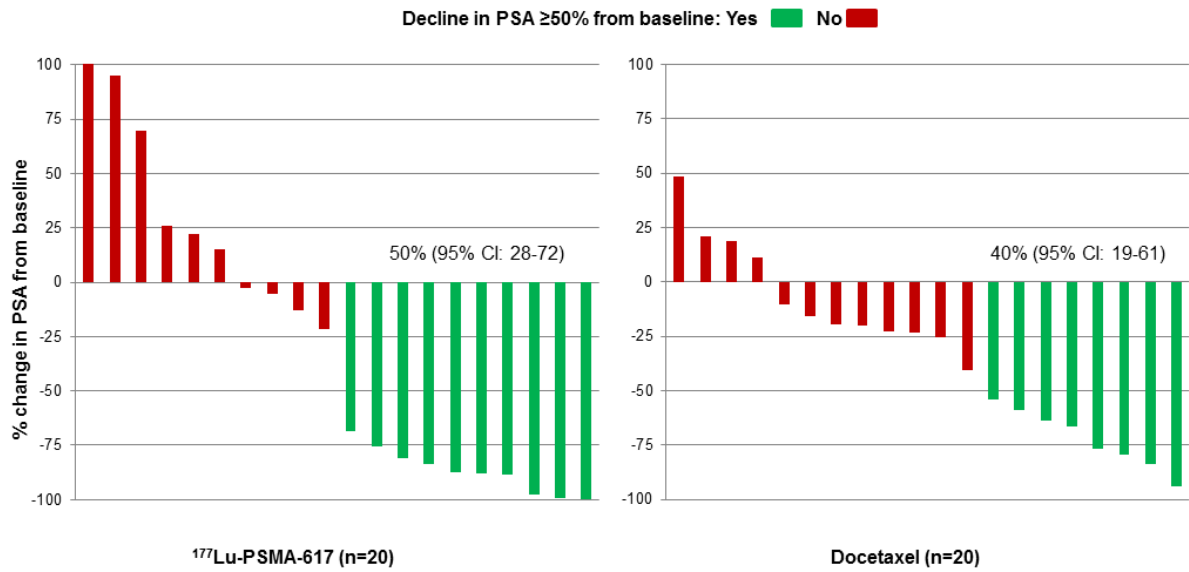

Supplement: 259_2021_5618_MOESM1_ESM.pdf [file 259_2021_5618_MOESM1_ESM.pdf]
